# Supplementary material
Source: Springer Nature journal article supplement (https://www.springermedizin.de/resource/supplementary/12958_2003_12_MOESM4_ESM.pdf/9566162)

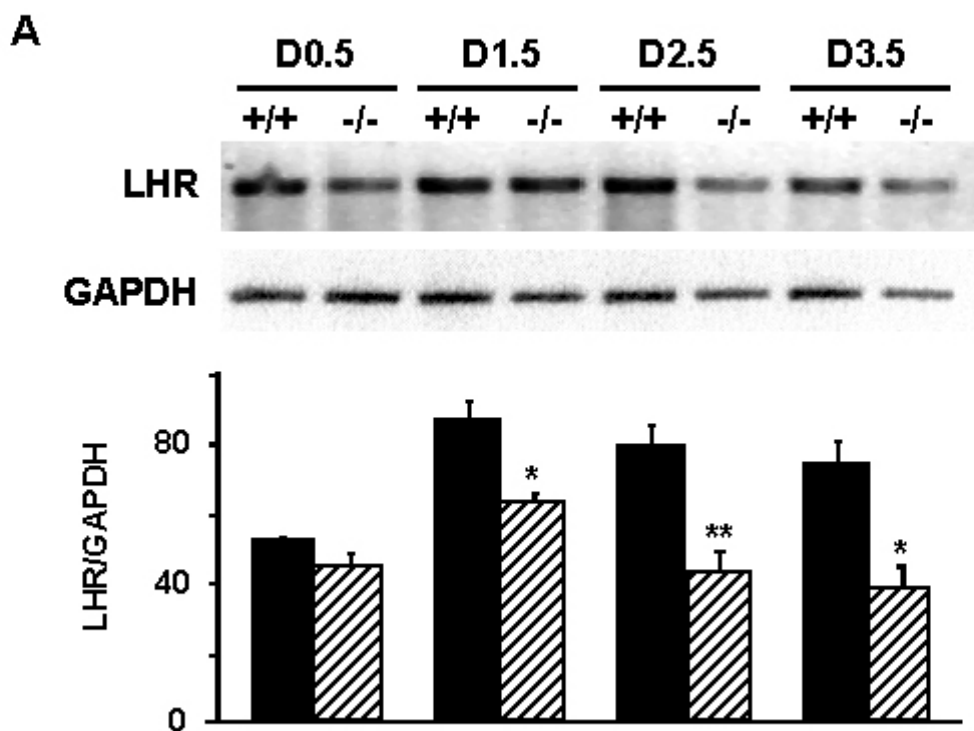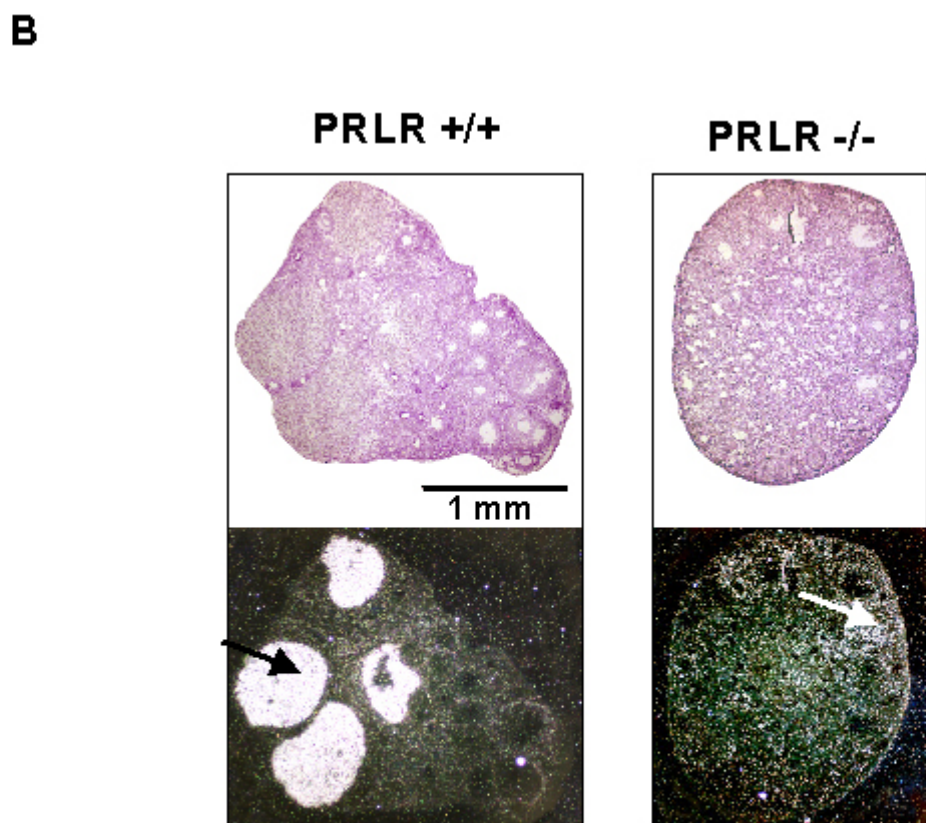

Supplement: MOESM4 [file 9566162]
